# Supplementary material for: Mechanochemical synthesis of fluorinated perovskites KCuF3 and KNiF3
Source: Royal Society of Chemistry journal article supplement (doi:10.1039/d4mr00037d), 2024-01-01
Supplement: d4mr00037d1.pdf [file d4mr00037d1.pdf]

## SUPPORTING INFORMATION

### Mechanochemical synthesis of fluorinated perovskites $\text{KCuF}_3$ and $\text{KNiF}_3$

Davide Ceriotti<sup>a</sup>, Piergiorgio Marziani<sup>a</sup>, Federico Maria Scesa<sup>a</sup>, Arianna Collorà<sup>a</sup>, Claudia L. Bianchi<sup>b,c</sup>, Luca Magagnin<sup>a,d</sup>, Maurizio Sansotera<sup>a,d\*</sup>

#### X-Ray powder diffraction pattern

#### $\text{KCuF}_3$

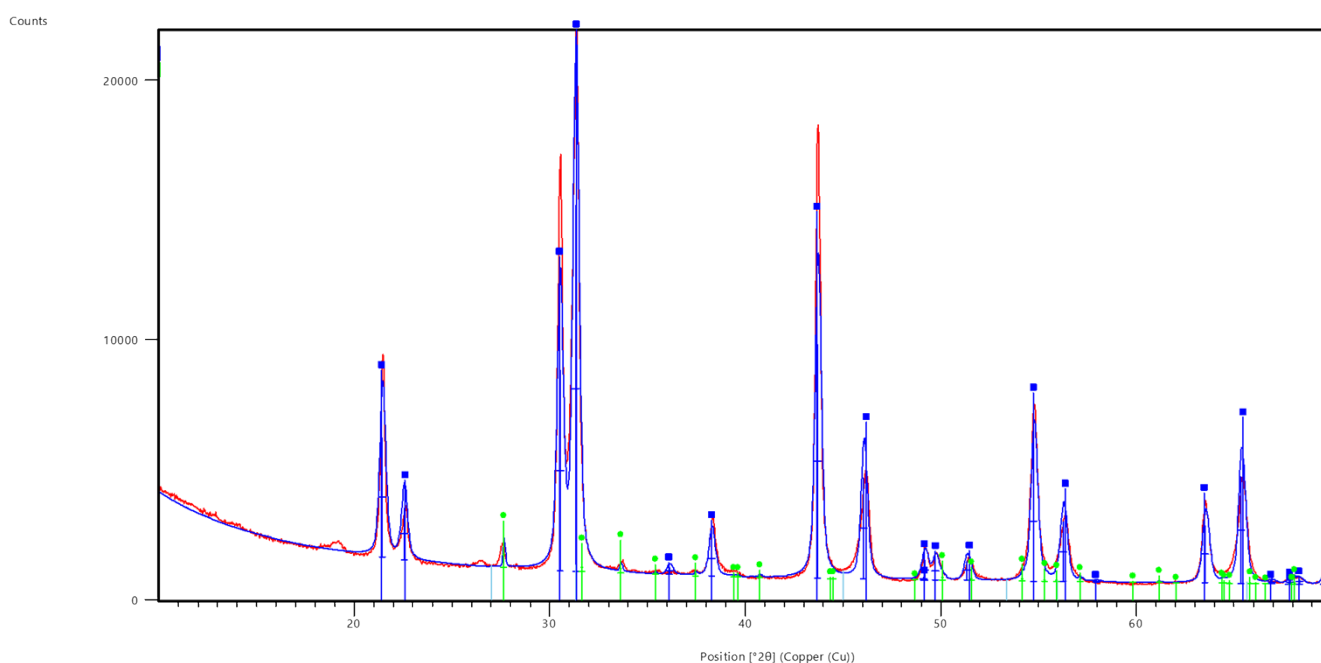

**Figure 1.** XRD pattern of  $\text{KCuF}_3$  at 3h of milling and the corresponding Rietveld refinement.

$$R_{\text{wp}} = 11.78$$

**Tab 1.** Peak List  $\text{KCuF}_3$  at 3h of milling with relative peak intensity used for the phase quantification.

| Pos. [°2θ] | Height [cts] | FWHM Left [°2θ] | d-spacing [Å] | Rel. Int. [%] | Matched by  |
|------------|--------------|-----------------|---------------|---------------|-------------|
| 21.4460    | 4578.34      | 0.3562          | 4.14003       | 32.50         | 98-001-7011 |
| 22.5538    | 1951.30      | 0.3562          | 3.93913       | 13.85         | 98-001-7011 |
| 27.6538    | 961.39       | 0.1000          | 3.22315       | 6.83          | 98-000-6024 |
| 30.5149    | 7707.52      | 0.3562          | 2.92715       | 54.72         | 98-001-7011 |
| 31.3226    | 14085.51     | 0.3562          | 2.85349       | 100.00        | 98-001-7011 |
| 31.6413    | 289.42       | 0.1000          | 2.82547       | 2.05          | 98-000-6024 |
| 33.6242    | 339.77       | 0.1000          | 2.66324       | 2.41          | 98-000-6024 |

|         |         |        |         |       |                          |
|---------|---------|--------|---------|-------|--------------------------|
| 35.3983 | 102.09  | 0.1000 | 2.53372 | 0.72  | 98-000-6024              |
| 36.1249 | 294.67  | 0.3562 | 2.48441 | 2.09  | 98-001-7011              |
| 37.4453 | 126.69  | 0.1000 | 2.39978 | 0.90  | 98-000-6024              |
| 38.2809 | 1349.52 | 0.3562 | 2.34930 | 9.58  | 98-001-7011              |
| 39.4103 | 37.29   | 0.1000 | 2.28453 | 0.26  | 98-000-6024              |
| 39.6121 | 38.92   | 0.1000 | 2.27336 | 0.28  | 98-000-6024              |
| 40.7356 | 69.99   | 0.1000 | 2.21321 | 0.50  | 98-000-6024              |
| 43.7012 | 8961.96 | 0.3562 | 2.06965 | 63.63 | 98-001-7011              |
| 44.3403 | 19.57   | 0.1000 | 2.04129 | 0.14  | 98-000-6024              |
| 44.4779 | 22.21   | 0.1000 | 2.03530 | 0.16  | 98-000-6024              |
| 46.0542 | 3876.45 | 0.3562 | 1.96924 | 27.52 | 98-001-7011              |
| 48.6669 | 1.05    | 0.1000 | 1.86945 | 0.01  | 98-000-6024              |
| 49.1033 | 98.52   | 0.3562 | 1.85385 | 0.70  | 98-001-7011              |
| 49.1806 | 753.20  | 0.3562 | 1.85112 | 5.35  | 98-001-7011              |
| 49.7268 | 699.19  | 0.3562 | 1.83206 | 4.96  | 98-001-7011              |
| 50.0990 | 194.45  | 0.1000 | 1.81931 | 1.38  | 98-000-6024              |
| 51.3397 | 741.01  | 0.3562 | 1.77822 | 5.26  | 98-001-7011              |
| 51.5611 | 134.00  | 0.1000 | 1.77110 | 0.95  | 98-001-7011, 98-000-6024 |
| 54.1637 | 166.64  | 0.1000 | 1.69199 | 1.18  | 98-000-6024              |
| 54.7492 | 4635.35 | 0.3562 | 1.67527 | 32.91 | 98-001-7011              |
| 55.3161 | 125.90  | 0.1000 | 1.65943 | 0.89  | 98-000-6024              |
| 55.9253 | 107.41  | 0.1000 | 1.64279 | 0.76  | 98-000-6024              |
| 56.2601 | 2283.37 | 0.3562 | 1.63381 | 16.21 | 98-001-7011              |
| 57.1159 | 172.80  | 0.1000 | 1.61135 | 1.23  | 98-000-6024              |
| 57.9519 | 43.30   | 0.3562 | 1.59007 | 0.31  | 98-001-7011              |
| 59.8111 | 4.73    | 0.1000 | 1.54501 | 0.03  | 98-000-6024              |
| 61.1709 | 65.51   | 0.1000 | 1.51389 | 0.47  | 98-000-6024              |
| 62.0176 | 0.57    | 0.1000 | 1.49523 | 0.00  | 98-000-6024              |
| 63.5228 | 2210.02 | 0.3562 | 1.46338 | 15.69 | 98-001-7011              |
| 64.3621 | 48.69   | 0.1000 | 1.44631 | 0.35  | 98-000-6024              |
| 64.4754 | 45.17   | 0.1000 | 1.44404 | 0.32  | 98-000-6024              |
| 64.7596 | 44.65   | 0.1000 | 1.43839 | 0.32  |                          |
| 65.3632 | 4102.93 | 0.3562 | 1.42656 | 29.13 | 98-001-7011              |
| 65.8089 | 66.01   | 0.1000 | 1.41797 | 0.47  | 98-000-6024              |
| 66.0936 | 6.07    | 0.1000 | 1.41255 | 0.04  | 98-000-6024              |
| 66.6228 | 2.35    | 0.1000 | 1.40261 | 0.02  | 98-000-6024              |
| 66.9166 | 102.98  | 0.3562 | 1.39717 | 0.73  | 98-001-7011              |
| 67.8160 | 22.46   | 0.3562 | 1.38081 | 0.16  | 98-001-7011              |
| 67.8791 | 158.29  | 0.3562 | 1.37968 | 1.12  | 98-001-7011, 98-000-6024 |

|         |        |        |         |      |                          |
|---------|--------|--------|---------|------|--------------------------|
| 67.9596 | 7.98   | 0.1000 | 1.37824 | 0.06 | 98-001-7011, 98-000-6024 |
| 68.0790 | 91.68  | 0.1000 | 1.37611 | 0.65 | 98-001-7011, 98-000-6024 |
| 68.3265 | 180.89 | 0.3562 | 1.37173 | 1.28 | 98-001-7011, 98-000-6024 |
| 69.5980 | 23.62  | 0.3562 | 1.34975 | 0.17 | 98-001-7011              |
| 69.6459 | 0.03   | 0.1000 | 1.34893 | 0.00 | 98-001-7011              |
| 69.6604 | 398.37 | 0.3562 | 1.34869 | 2.83 | 98-001-7011              |

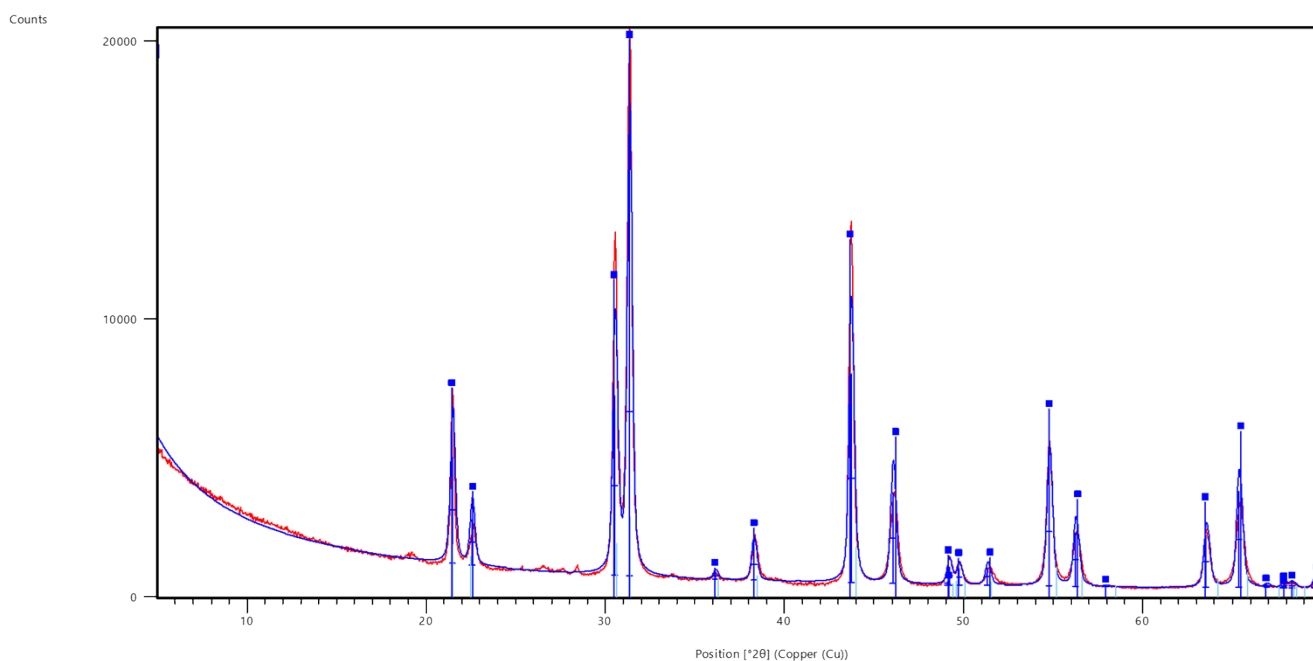

**Figure 2.** XRD pattern of  $\text{KCuF}_3$  at 6h of milling and the corresponding Rietveld refinement.  
 $R_{\text{wp}} = 11.82$

**Tab 2.** Peak List  $\text{KCuF}_3$  at 6h of milling with relative peak intensity used for the phase quantification.

| Pos. [ $^{\circ}2\theta$ ] | Height [cts] | FWHM Left [ $^{\circ}2\theta$ ] | d-spacing [ $\text{\AA}$ ] | Rel. Int. [%] | Matched by  |
|----------------------------|--------------|---------------------------------|----------------------------|---------------|-------------|
| 21.4767                    | 3825.11      | 0.3177                          | 4.13418                    | 32.44         | 98-001-7011 |
| 22.5726                    | 1632.59      | 0.3177                          | 3.93589                    | 13.85         | 98-001-7011 |
| 30.5422                    | 6446.80      | 0.3177                          | 2.92460                    | 54.67         | 98-001-7011 |
| 31.3411                    | 11791.23     | 0.3177                          | 2.85185                    | 100.00        | 98-001-7011 |
| 36.1480                    | 246.65       | 0.3177                          | 2.48287                    | 2.09          | 98-001-7011 |
| 38.2978                    | 1130.52      | 0.3177                          | 2.34830                    | 9.59          | 98-001-7011 |
| 43.7228                    | 7503.33      | 0.3177                          | 2.06868                    | 63.63         | 98-001-7011 |

|         |         |        |         |       |             |
|---------|---------|--------|---------|-------|-------------|
| 46.0503 | 3251.96 | 0.3177 | 1.96939 | 27.58 | 98-001-7011 |
| 49.1093 | 82.60   | 0.3177 | 1.85364 | 0.70  | 98-001-7011 |
| 49.1996 | 630.77  | 0.3177 | 1.85044 | 5.35  | 98-001-7011 |
| 49.7398 | 585.79  | 0.3177 | 1.83161 | 4.97  | 98-001-7011 |
| 51.3352 | 621.62  | 0.3177 | 1.77837 | 5.27  | 98-001-7011 |
| 54.7601 | 3883.98 | 0.3177 | 1.67496 | 32.94 | 98-001-7011 |
| 56.2544 | 1915.24 | 0.3177 | 1.63396 | 16.24 | 98-001-7011 |
| 57.9652 | 36.29   | 0.3177 | 1.58974 | 0.31  | 98-001-7011 |
| 63.5343 | 1851.97 | 0.3177 | 1.46314 | 15.71 | 98-001-7011 |
| 65.3542 | 3442.32 | 0.3177 | 1.42673 | 29.19 | 98-001-7011 |
| 66.9249 | 86.32   | 0.3177 | 1.39701 | 0.73  | 98-001-7011 |
| 67.8143 | 18.84   | 0.3177 | 1.38084 | 0.16  | 98-001-7011 |
| 67.8881 | 132.68  | 0.3177 | 1.37952 | 1.13  | 98-001-7011 |
| 68.3304 | 151.67  | 0.3177 | 1.37166 | 1.29  | 98-001-7011 |
| 69.5765 | 19.83   | 0.3177 | 1.35011 | 0.17  | 98-001-7011 |
| 69.6494 | 334.31  | 0.3177 | 1.34887 | 2.84  | 98-001-7011 |

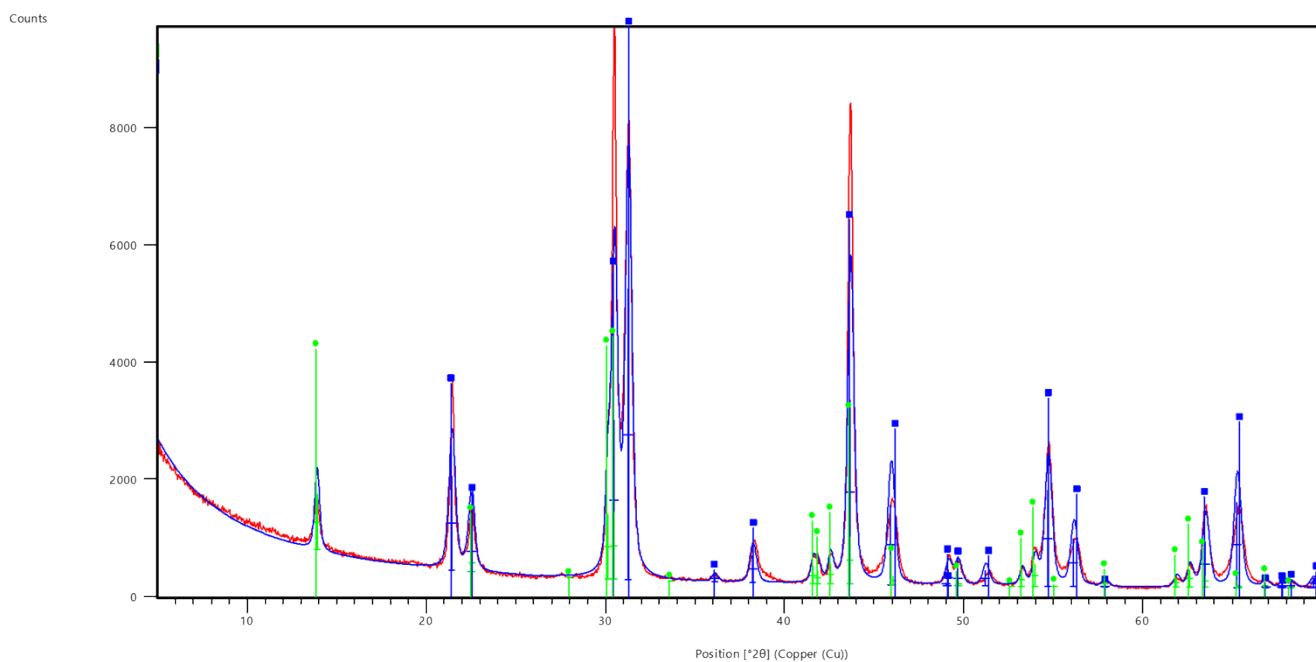

**Figure 3.** XRD pattern of  $KCuF_3$  at 12h of milling and the corresponding Rietveld refinement.  
 $R_{wp}=15.18$

**Tab 3.** Peak List  $KCuF_3$  at 12h of milling with relative peak intensity used for the phase quantification.

| Pos. | Height | FWHM Left | d-spacing | Rel. Int. | Matched by |
|------|--------|-----------|-----------|-----------|------------|
|------|--------|-----------|-----------|-----------|------------|

| [°2 $\theta$ ] | [cts]   | [°2 $\theta$ ] | [Å]     | [%]    |                          |
|----------------|---------|----------------|---------|--------|--------------------------|
| 13.8920        | 942.06  | 0.3254         | 6.36960 | 19.03  | 98-001-5372              |
| 21.4340        | 1603.33 | 0.4317         | 4.14232 | 32.39  | 98-001-7011              |
| 22.4962        | 686.69  | 0.4317         | 3.94908 | 13.87  | 98-001-7011, 98-001-5372 |
| 22.5547        | 272.21  | 0.3254         | 3.93896 | 5.50   | 98-001-7011, 98-001-5372 |
| 27.9952        | 0.83    | 0.3254         | 3.18461 | 0.02   | 98-001-5372              |
| 30.1169        | 1094.36 | 0.3254         | 2.96492 | 22.11  | 98-001-7011, 98-001-5372 |
| 30.4952        | 2700.41 | 0.4317         | 2.92900 | 54.56  | 98-001-7011, 98-001-5372 |
| 30.4979        | 1133.32 | 0.3254         | 2.92874 | 22.90  | 98-001-7011, 98-001-5372 |
| 31.2693        | 4949.61 | 0.4317         | 2.85823 | 100.00 | 98-001-7011              |
| 33.6547        | 2.61    | 0.3254         | 2.66089 | 0.05   | 98-001-5372              |
| 36.0930        | 103.36  | 0.4317         | 2.48653 | 2.09   | 98-001-7011              |
| 38.2267        | 474.58  | 0.4317         | 2.35250 | 9.59   | 98-001-7011              |
| 41.5842        | 295.34  | 0.3254         | 2.16999 | 5.97   | 98-001-5372              |
| 41.8731        | 217.24  | 0.3254         | 2.15569 | 4.39   | 98-001-5372              |
| 42.5482        | 336.63  | 0.3254         | 2.12303 | 6.80   | 98-001-5372              |
| 43.6696        | 3142.13 | 0.4317         | 2.07108 | 63.48  | 98-001-7011, 98-001-5372 |
| 43.6735        | 810.00  | 0.3254         | 2.07090 | 16.36  | 98-001-7011, 98-001-5372 |
| 45.9253        | 1369.07 | 0.4317         | 1.97446 | 27.66  | 98-001-7011, 98-001-5372 |
| 46.0500        | 144.81  | 0.3254         | 1.96941 | 2.93   | 98-001-7011, 98-001-5372 |
| 49.0155        | 34.70   | 0.4317         | 1.85696 | 0.70   | 98-001-7011              |
| 49.1437        | 264.11  | 0.4317         | 1.85242 | 5.34   | 98-001-7011              |
| 49.6669        | 245.56  | 0.4317         | 1.83412 | 4.96   | 98-001-7011, 98-001-5372 |
| 49.6999        | 65.19   | 0.3254         | 1.83298 | 1.32   | 98-001-7011, 98-001-5372 |
| 51.2130        | 261.47  | 0.4317         | 1.78232 | 5.28   | 98-001-7011              |
| 52.6803        | 0.41    | 0.3254         | 1.73608 | 0.01   |                          |
| 53.2485        | 222.89  | 0.3254         | 1.71889 | 4.50   | 98-001-5372              |
| 53.9651        | 368.26  | 0.3254         | 1.69775 | 7.44   | 98-001-5372              |
| 54.6858        | 1627.61 | 0.4317         | 1.67706 | 32.88  | 98-001-7011, 98-001-5372 |

|         |         |        |         |       |                          |
|---------|---------|--------|---------|-------|--------------------------|
| 55.0791 | 5.43    | 0.3254 | 1.66601 | 0.11  | 98-001-7011, 98-001-5372 |
| 56.1337 | 804.85  | 0.4317 | 1.63719 | 16.26 | 98-001-7011              |
| 57.8650 | 79.26   | 0.3254 | 1.59225 | 1.60  | 98-001-7011, 98-001-5372 |
| 57.9010 | 15.20   | 0.4317 | 1.59135 | 0.31  | 98-001-7011, 98-001-5372 |
| 61.8843 | 149.33  | 0.3254 | 1.49813 | 3.02  | 98-001-5372              |
| 62.6141 | 292.03  | 0.3254 | 1.48241 | 5.90  | 98-001-5372              |
| 63.4708 | 775.34  | 0.4317 | 1.46445 | 15.66 | 98-001-7011, 98-001-5372 |
| 63.4769 | 182.91  | 0.3254 | 1.46433 | 3.70  | 98-001-7011, 98-001-5372 |
| 65.2339 | 1445.79 | 0.4317 | 1.42907 | 29.21 | 98-001-7011, 98-001-5372 |
| 65.3356 | 37.85   | 0.3254 | 1.42709 | 0.76  | 98-001-7011, 98-001-5372 |
| 66.8244 | 62.40   | 0.3254 | 1.39887 | 1.26  | 98-001-7011, 98-001-5372 |
| 66.8561 | 36.15   | 0.4317 | 1.39828 | 0.73  | 98-001-7011, 98-001-5372 |
| 67.7175 | 7.90    | 0.4317 | 1.38258 | 0.16  | 98-001-7011, 98-001-5372 |
| 67.8221 | 55.55   | 0.4317 | 1.38070 | 1.12  | 98-001-7011, 98-001-5372 |
| 68.2506 | 63.55   | 0.4317 | 1.37307 | 1.28  | 98-001-7011, 98-001-5372 |
| 68.2806 | 7.37    | 0.3254 | 1.37254 | 0.15  | 98-001-7011, 98-001-5372 |
| 69.4249 | 8.35    | 0.4317 | 1.35269 | 0.17  | 98-001-7011              |
| 69.5283 | 140.41  | 0.4317 | 1.35093 | 2.84  | 98-001-7011              |

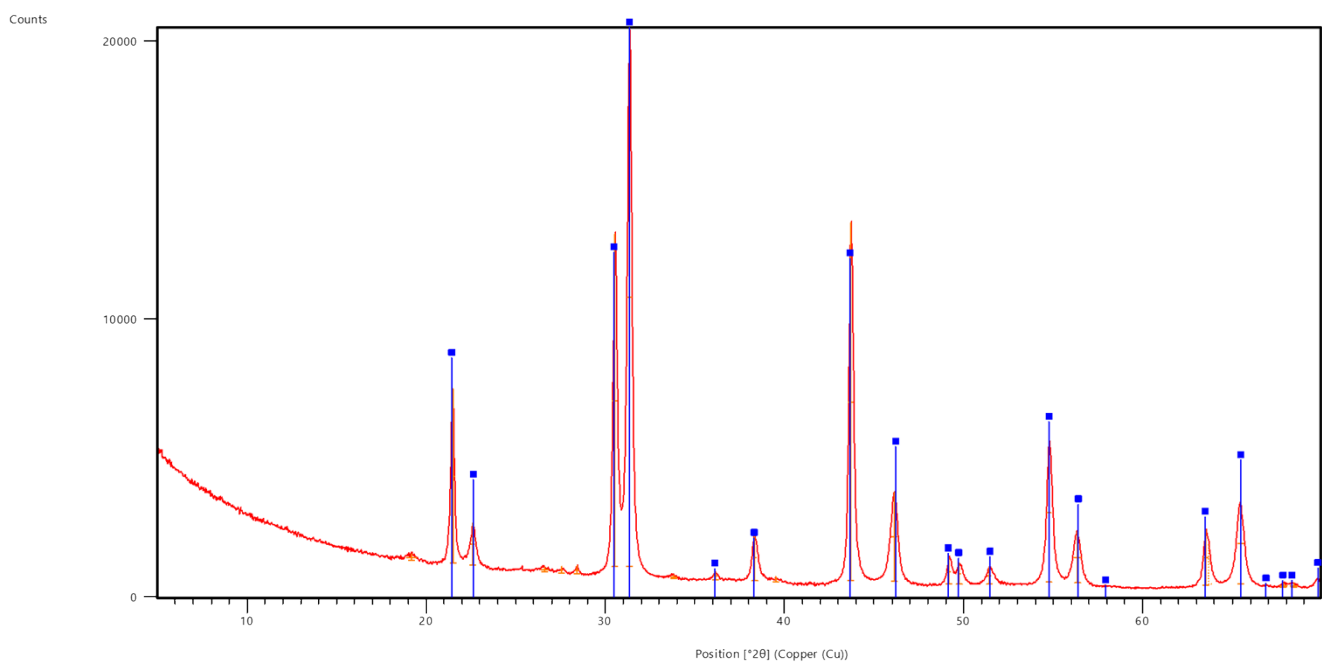

**Figure 4.** XRD pattern of  $\text{KCuF}_3$  solvothermal and the corresponding Rietveld refinement.

$$R_{\text{wp}} = 21.60$$

**Tab 4.** Peak List  $\text{KCuF}_3$  at solvothermal with relative peak intensity used for the phase quantification.

| Pos. [ $^{\circ}2\theta$ ] | Height [cts] | FWHM Left [ $^{\circ}2\theta$ ] | d-spacing [ $\text{\AA}$ ] | Rel. Int. [%] | Matched by  |
|----------------------------|--------------|---------------------------------|----------------------------|---------------|-------------|
| 21.4415                    | 4491.59      | 0.2060                          | 4.14089                    | 8.40          | 98-001-7011 |
| 22.6136                    | 1901.02      | 0.2060                          | 3.92884                    | 3.55          | 98-001-7011 |
| 24.4766                    | 321.83       | 0.0902                          | 3.63386                    | 0.60          | 98-024-0524 |
| 28.3378                    | 53499.88     | 0.0902                          | 3.14689                    | 100.00        | 98-024-0524 |
| 30.5083                    | 7562.12      | 0.2060                          | 2.92776                    | 14.13         | 98-001-7011 |
| 31.3636                    | 13761.46     | 0.2060                          | 2.84985                    | 25.72         | 98-001-7011 |
| 36.1276                    | 288.87       | 0.2060                          | 2.48423                    | 0.54          | 98-001-7011 |
| 38.3126                    | 1319.11      | 0.2060                          | 2.34743                    | 2.47          | 98-001-7011 |
| 40.5101                    | 35670.40     | 0.0902                          | 2.22501                    | 66.67         | 98-024-0524 |
| 43.6915                    | 8794.30      | 0.2060                          | 2.07009                    | 16.44         | 98-001-7011 |
| 46.1817                    | 3764.58      | 0.2060                          | 1.96409                    | 7.04          | 98-001-7011 |
| 47.9035                    | 206.16       | 0.0902                          | 1.89744                    | 0.39          | 98-024-0524 |
| 49.1661                    | 96.13        | 0.2060                          | 1.85163                    | 0.18          | 98-001-7011 |
| 49.1695                    | 739.13       | 0.2060                          | 1.85151                    | 1.38          | 98-001-7011 |
| 49.7481                    | 684.57       | 0.2060                          | 1.83132                    | 1.28          | 98-001-7011 |
| 50.1776                    | 11486.10     | 0.0902                          | 1.81665                    | 21.47         | 98-024-0524 |
| 51.4552                    | 720.77       | 0.2060                          | 1.77450                    | 1.35          | 98-001-7011 |

|         |          |        |         |       |             |
|---------|----------|--------|---------|-------|-------------|
| 54.7671 | 4540.11  | 0.2060 | 1.67476 | 8.49  | 98-001-7011 |
| 56.3665 | 2224.28  | 0.2060 | 1.63098 | 4.16  | 98-001-7011 |
| 57.9458 | 42.48    | 0.2060 | 1.59023 | 0.08  | 98-001-7011 |
| 58.6325 | 4984.34  | 0.0902 | 1.57323 | 9.32  | 98-024-0524 |
| 63.5077 | 2168.99  | 0.2060 | 1.46369 | 4.05  | 98-001-7011 |
| 64.4938 | 55.81    | 0.0902 | 1.44367 | 0.10  | 98-024-0524 |
| 65.4569 | 4001.32  | 0.2060 | 1.42474 | 7.48  | 98-001-7011 |
| 66.3820 | 12970.68 | 0.0902 | 1.40711 | 24.24 | 98-024-0524 |
| 66.9073 | 101.04   | 0.2060 | 1.39734 | 0.19  | 98-001-7011 |
| 67.8600 | 21.97    | 0.2060 | 1.38002 | 0.04  | 98-001-7011 |
| 67.8628 | 155.37   | 0.2060 | 1.37997 | 0.29  | 98-001-7011 |
| 68.3367 | 177.27   | 0.2060 | 1.37155 | 0.33  | 98-001-7011 |
| 69.7467 | 22.95    | 0.2060 | 1.34723 | 0.04  | 98-001-7011 |
| 69.7494 | 388.59   | 0.2060 | 1.34719 | 0.73  | 98-001-7011 |

### KNiF<sub>3</sub>

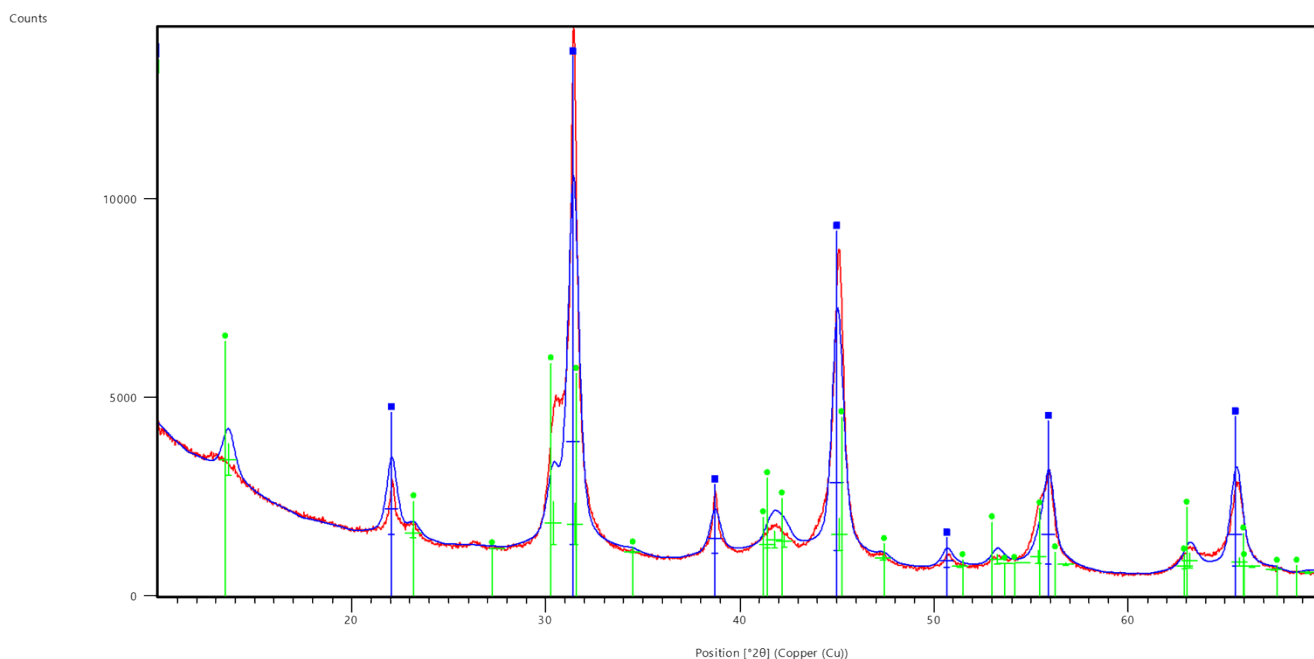

**Figure 5.** XRD pattern of KNiF<sub>3</sub> at 3h of milling and the corresponding Rietveld refinement.

$$R_{wp} = 11.81$$

**Tab 5.** Peak List KNiF<sub>3</sub> at 3h of milling with relative peak intensity used for the phase quantification.

| Pos. [°2θ] | Height [cts] | FWHM Left [°2θ] | d-spacing [Å] | Rel. Int. [%] | Matched by |
|------------|--------------|-----------------|---------------|---------------|------------|
|------------|--------------|-----------------|---------------|---------------|------------|



|         |         |        |         |        |                          |
|---------|---------|--------|---------|--------|--------------------------|
| 13.6484 | 780.68  | 0.7588 | 6.48272 | 14.00  | 98-063-1720              |
| 22.0550 | 1294.75 | 0.6409 | 4.02707 | 25.87  | 98-018-9369              |
| 23.1747 | 219.74  | 0.7588 | 3.83497 | 4.22   | 98-063-1720              |
| 27.5044 | 1.63    | 0.7588 | 3.24032 | 0.03   | 98-063-1720              |
| 30.3700 | 1091.48 | 0.7588 | 2.94079 | 18.97  | 98-063-1720              |
| 31.3932 | 5205.41 | 0.6409 | 2.84723 | 100.00 | 98-018-9369, 98-063-1720 |
| 31.4918 | 1044.18 | 0.7588 | 2.83854 | 20.06  | 98-018-9369, 98-063-1720 |
| 34.4675 | 34.06   | 0.7588 | 2.59999 | 0.65   | 98-063-1720              |
| 38.7033 | 742.59  | 0.6409 | 2.32462 | 14.27  | 98-018-9369              |
| 41.4351 | 183.95  | 0.7588 | 2.17746 | 3.53   | 98-063-1720              |
| 41.7862 | 412.60  | 0.7588 | 2.15996 | 7.93   | 98-063-1720              |
| 42.2991 | 296.95  | 0.7588 | 2.13495 | 5.70   | 98-063-1720              |
| 44.9947 | 3409.90 | 0.6409 | 2.01312 | 67.51  | 98-018-9369, 98-063-1720 |
| 45.1400 | 819.51  | 0.7588 | 2.00697 | 15.74  | 98-018-9369, 98-063-1720 |
| 47.3820 | 104.06  | 0.7588 | 1.91710 | 2.00   | 98-063-1720              |
| 50.6580 | 307.64  | 0.6409 | 1.80054 | 5.91   | 98-018-9369              |
| 51.3445 | 39.44   | 0.7588 | 1.77807 | 0.76   | 98-018-9369, 98-063-1720 |
| 53.2525 | 253.42  | 0.7588 | 1.71877 | 4.87   | 98-063-1720              |
| 53.6799 | 0.75    | 0.7588 | 1.70609 | 0.01   | 98-063-1720              |
| 54.5435 | 2.88    | 0.7588 | 1.68110 | 0.06   | 98-063-1720              |
| 55.3826 | 335.08  | 0.7588 | 1.65760 | 6.44   | 98-018-9369, 98-063-1720 |
| 55.8942 | 1527.01 | 0.6409 | 1.64363 | 29.34  | 98-018-9369, 98-063-1720 |
| 56.7877 | 72.78   | 0.7588 | 1.61987 | 1.40   | 98-063-1720              |
| 62.9346 | 85.19   | 0.7588 | 1.47563 | 1.64   | 98-063-1720              |
| 63.1962 | 363.57  | 0.7588 | 1.47015 | 6.98   | 98-063-1720              |
| 65.5270 | 1598.05 | 0.6409 | 1.42339 | 30.70  | 98-018-9369, 98-063-1720 |
| 65.7528 | 202.69  | 0.7588 | 1.41905 | 3.89   | 98-018-9369, 98-063-1720 |
| 66.3976 | 36.04   | 0.7588 | 1.40682 | 0.69   | 98-018-9369, 98-063-1720 |
| 67.5175 | 26.71   | 0.7588 | 1.38618 | 0.51   | 98-063-1720              |
| 69.2735 | 43.03   | 0.7588 | 1.35527 | 0.83   | 98-018-9369, 98-063-1720 |

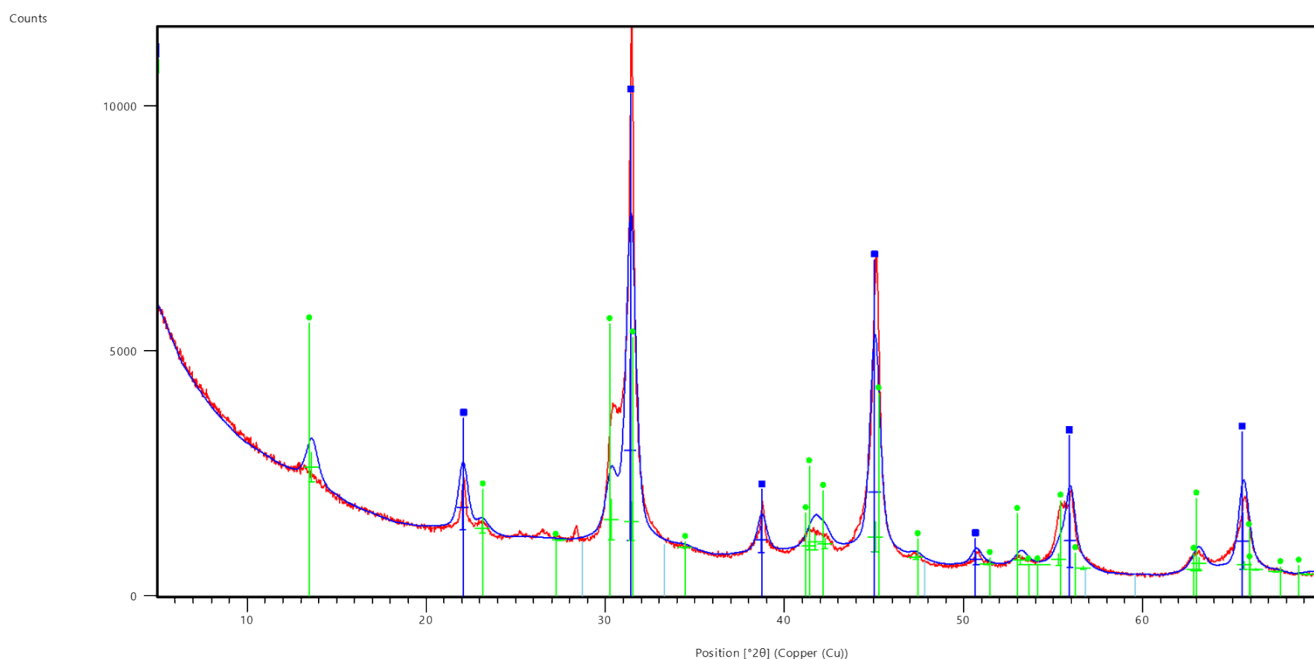

**Figure 6.** XRD pattern of  $\text{KNiF}_3$  at 6h of milling and the corresponding Rietveld refinement.  
 $R_{\text{wp}} = 11.51$

**Tab 6.** Peak List  $\text{KNiF}_3$  at 6h of milling with relative peak intensity used for the phase quantification.

| Pos. [°2θ] | Height [cts] | FWHM Left [°2θ] | d-spacing [Å] | Rel. Int. [%] | Matched by               |
|------------|--------------|-----------------|---------------|---------------|--------------------------|
| 13.6097    | 589.98       | 0.7516          | 6.50107       | 15.95         | 98-063-1720              |
| 22.0515    | 920.66       | 0.6197          | 4.02770       | 24.89         | 98-018-9369              |
| 23.1346    | 165.73       | 0.7516          | 3.84153       | 4.48          | 98-063-1720              |
| 27.4494    | 1.23         | 0.7516          | 3.24669       | 0.03          | 98-063-1720              |
| 30.3191    | 823.39       | 0.7516          | 2.94560       | 22.26         | 98-063-1720              |
| 31.3985    | 3698.30      | 0.6197          | 2.84676       | 100.00        | 98-018-9369, 98-063-1720 |
| 31.4467    | 787.25       | 0.7516          | 2.84251       | 21.29         | 98-018-9369, 98-063-1720 |
| 34.4176    | 25.70        | 0.7516          | 2.60364       | 0.69          | 98-063-1720              |
| 38.7158    | 527.26       | 0.6197          | 2.32390       | 14.26         | 98-018-9369              |
| 41.3687    | 138.82       | 0.7516          | 2.18080       | 3.75          | 98-063-1720              |
| 41.7136    | 311.59       | 0.7516          | 2.16356       | 8.43          | 98-063-1720              |
| 42.2373    | 224.10       | 0.7516          | 2.13794       | 6.06          | 98-063-1720              |
| 45.0137    | 2419.96      | 0.6197          | 2.01231       | 65.43         | 98-018-9369, 98-063-1720 |
| 45.0848    | 617.90       | 0.7516          | 2.00930       | 16.71         | 98-018-9369, 98-063-     |

|         |         |        |         |       |                          |
|---------|---------|--------|---------|-------|--------------------------|
|         |         |        |         |       | 1720                     |
| 47.3230 | 78.47   | 0.7516 | 1.91935 | 2.12  | 98-063-1720              |
| 50.6832 | 218.09  | 0.6197 | 1.79971 | 5.90  | 98-018-9369, 98-063-1720 |
| 51.2840 | 29.74   | 0.7516 | 1.78002 | 0.80  | 98-018-9369, 98-063-1720 |
| 53.1743 | 191.27  | 0.7516 | 1.72111 | 5.17  | 98-063-1720              |
| 53.6107 | 0.57    | 0.7516 | 1.70813 | 0.02  | 98-063-1720              |
| 54.4587 | 2.18    | 0.7516 | 1.68352 | 0.06  | 98-063-1720              |
| 55.3152 | 252.66  | 0.7516 | 1.65946 | 6.83  | 98-018-9369, 98-063-1720 |
| 55.9254 | 1083.17 | 0.6197 | 1.64279 | 29.29 | 98-018-9369, 98-063-1720 |
| 56.6949 | 54.98   | 0.7516 | 1.62231 | 1.49  | 98-018-9369, 98-063-1720 |
| 62.8545 | 64.27   | 0.7516 | 1.47732 | 1.74  | 98-063-1720              |
| 63.1113 | 274.39  | 0.7516 | 1.47193 | 7.42  | 98-063-1720              |
| 65.5701 | 1132.92 | 0.6197 | 1.42256 | 30.63 | 98-018-9369, 98-063-1720 |
| 65.6806 | 152.83  | 0.7516 | 1.42043 | 4.13  | 98-018-9369, 98-063-1720 |
| 66.2989 | 27.20   | 0.7516 | 1.40868 | 0.74  | 98-018-9369, 98-063-1720 |
| 67.4420 | 20.15   | 0.7516 | 1.38755 | 0.54  | 98-063-1720              |
| 69.1659 | 32.48   | 0.7516 | 1.35712 | 0.88  | 98-063-1720              |

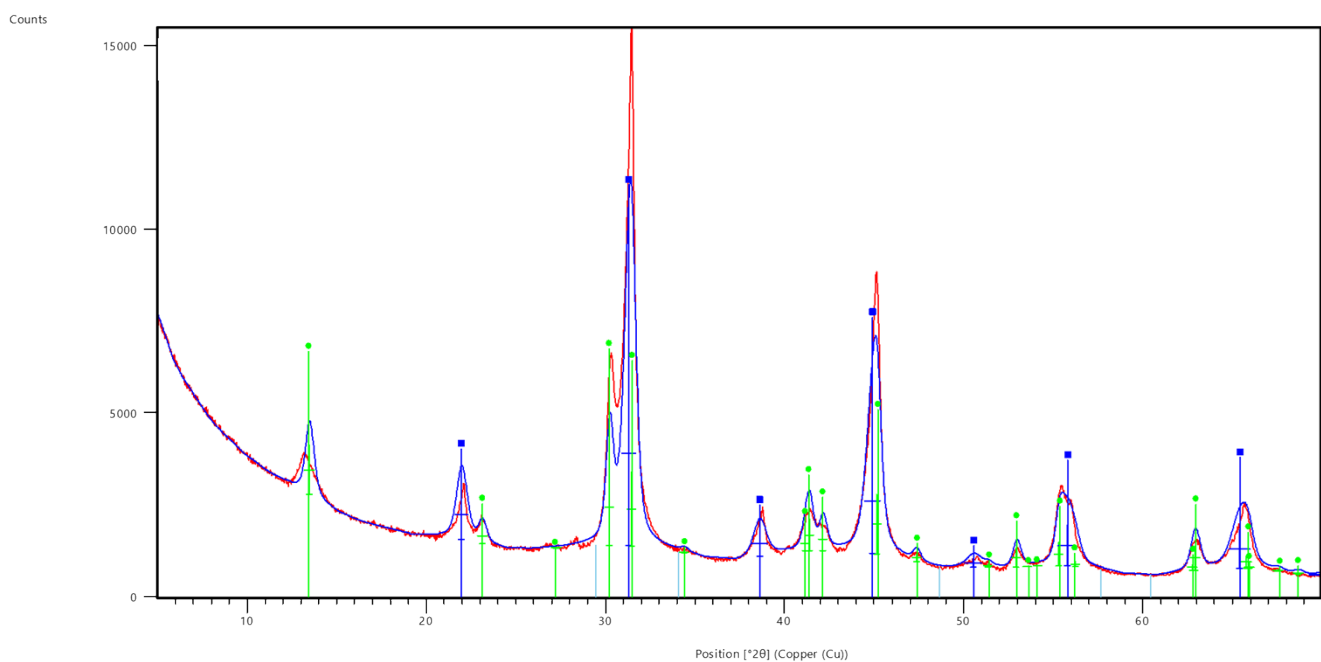

**Figure 7.** XRD pattern of  $\text{KNiF}_3$  at 12h of milling and the corresponding Rietveld refinement.  
 $R_{\text{wp}} = 10.34$

**Tab 7.** Peak List  $\text{KNiF}_3$  at 12h of milling with relative peak intensity used for the phase quantification.

| Pos. [°2θ] | Height [cts] | FWHM Left [°2θ] | d-spacing [Å] | Rel. Int. [%] | Matched by               |
|------------|--------------|-----------------|---------------|---------------|--------------------------|
| 13.4864    | 1341.33      | 0.5714          | 6.56021       | 26.63         | 98-063-1720              |
| 21.9774    | 1339.98      | 0.7198          | 4.04113       | 26.60         | 98-018-9369              |
| 23.1317    | 402.10       | 0.5248          | 3.84200       | 7.98          | 98-063-1720              |
| 27.2287    | 3.16         | 0.5090          | 3.27250       | 0.06          | 98-063-1720              |
| 30.2232    | 2117.80      | 0.4992          | 2.95473       | 42.05         | 98-063-1720              |
| 31.3046    | 5036.93      | 0.7691          | 2.85509       | 100.00        | 98-018-9369, 98-063-1720 |
| 31.4783    | 2015.58      | 0.4957          | 2.83972       | 40.02         | 98-018-9369, 98-063-1720 |
| 34.4057    | 66.99        | 0.4885          | 2.60451       | 1.33          | 98-063-1720              |
| 38.6057    | 669.87       | 0.8249          | 2.33027       | 13.30         | 98-018-9369              |
| 41.1550    | 374.69       | 0.4794          | 2.19162       | 7.44          | 98-063-1720              |
| 41.3858    | 849.51       | 0.4793          | 2.17994       | 16.87         | 98-063-1720              |
| 42.1242    | 601.03       | 0.4790          | 2.14341       | 11.93         | 98-063-1720              |
| 44.8890    | 2868.53      | 0.8846          | 2.01761       | 56.95         | 98-018-9369, 98-063-1720 |
| 45.1451    | 1632.62      | 0.4794          | 2.00676       | 32.41         | 98-018-9369, 98-063-     |

|         |         |        |         |       |                          |
|---------|---------|--------|---------|-------|--------------------------|
|         |         |        |         |       | 1720                     |
| 47.3501 | 207.08  | 0.4812 | 1.91832 | 4.11  | 98-063-1720              |
| 50.5448 | 241.87  | 0.9474 | 1.80431 | 4.80  | 98-018-9369              |
| 51.3492 | 77.14   | 0.4883 | 1.77792 | 1.53  | 98-063-1720              |
| 52.9366 | 502.23  | 0.4924 | 1.72828 | 9.97  | 98-063-1720              |
| 53.5507 | 1.47    | 0.4942 | 1.70990 | 0.03  | 98-063-1720              |
| 54.1166 | 5.75    | 0.4960 | 1.69335 | 0.11  | 98-063-1720              |
| 55.3219 | 642.75  | 0.5001 | 1.65927 | 12.76 | 98-018-9369, 98-063-1720 |
| 55.7737 | 1121.38 | 1.0131 | 1.64690 | 22.26 | 98-018-9369, 98-063-1720 |
| 56.2428 | 143.22  | 0.5036 | 1.63427 | 2.84  | 98-018-9369, 98-063-1720 |
| 62.7592 | 153.48  | 0.5359 | 1.47934 | 3.05  | 98-063-1720              |
| 62.9304 | 657.47  | 0.5370 | 1.47572 | 13.05 | 98-063-1720              |
| 65.3919 | 1030.22 | 1.1542 | 1.42600 | 20.45 | 98-018-9369, 98-063-1720 |
| 65.7899 | 347.71  | 0.5558 | 1.41834 | 6.90  | 98-018-9369, 98-063-1720 |
| 65.9183 | 63.43   | 0.5567 | 1.41588 | 1.26  | 98-018-9369, 98-063-1720 |
| 67.5256 | 44.86   | 0.5685 | 1.38604 | 0.89  | 98-063-1720              |
| 68.6749 | 73.36   | 0.5776 | 1.36562 | 1.46  | 98-063-1720              |
| 69.9177 | 7.99    | 1.2302 | 1.34436 | 0.16  | 98-018-9369              |
| 69.9177 | 31.95   | 1.2302 | 1.34436 | 0.63  | 98-018-9369              |

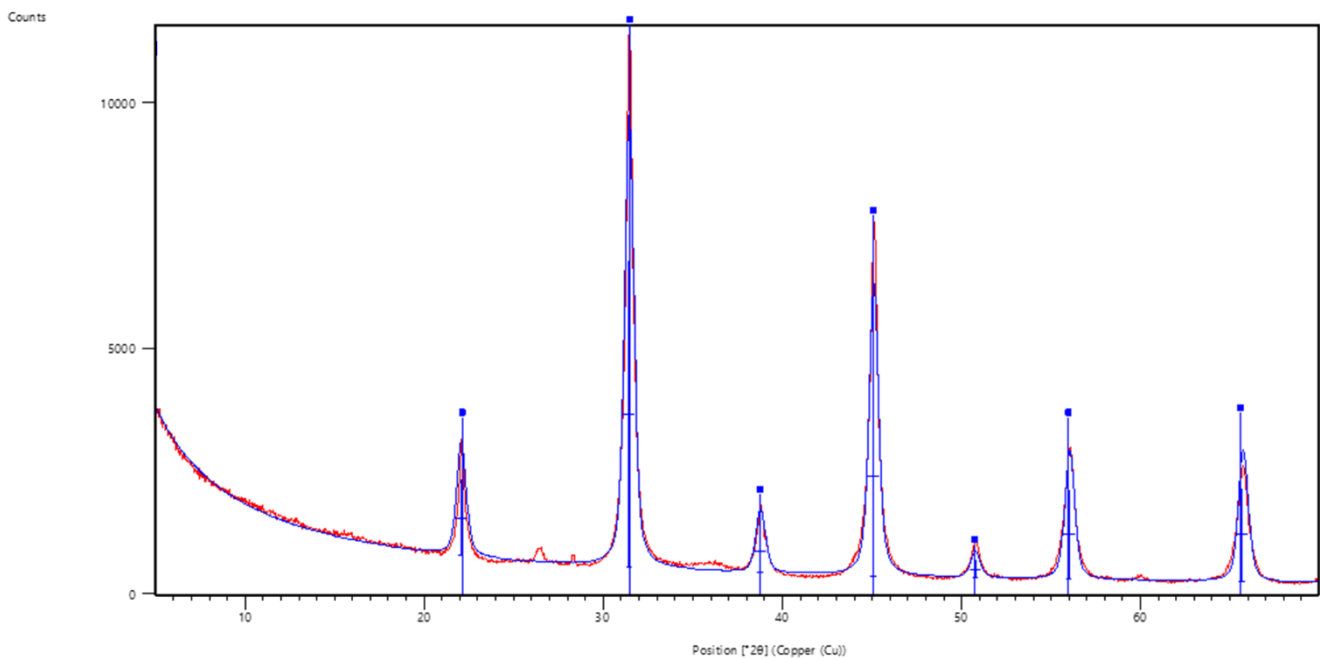

**Figure 8.** XRD pattern of  $\text{KNiF}_3$  solvothermal and the corresponding Rietveld refinement.

$$R_{\text{wp}} = 11.42$$

**Tab 8.** Peak List  $\text{KNiF}_3$  solvothermal with relative peak intensity used for the phase quantification.

| Pos. [ $^{\circ}2\theta$ ] | Height [cts] | FWHM Left [ $^{\circ}2\theta$ ] | d-spacing [ $\text{\AA}$ ] | Rel. Int. [%] | Matched by  |
|----------------------------|--------------|---------------------------------|----------------------------|---------------|-------------|
| 22.0615                    | 1556.73      | 0.6155                          | 4.02590                    | 24.93         | 98-018-9369 |
| 31.4280                    | 6244.44      | 0.6155                          | 2.84415                    | 100.00        | 98-018-9369 |
| 38.7614                    | 889.18       | 0.6155                          | 2.32127                    | 14.24         | 98-018-9369 |
| 45.0738                    | 4077.22      | 0.6155                          | 2.00976                    | 65.29         | 98-018-9369 |
| 50.7570                    | 366.60       | 0.6155                          | 1.79726                    | 5.87          | 98-018-9369 |
| 56.0126                    | 1823.30      | 0.6155                          | 1.64044                    | 29.20         | 98-018-9369 |
| 65.6835                    | 1904.86      | 0.6155                          | 1.42038                    | 30.50         | 98-018-9369 |

# XPS survey

## KCuF<sub>3</sub>

6h:

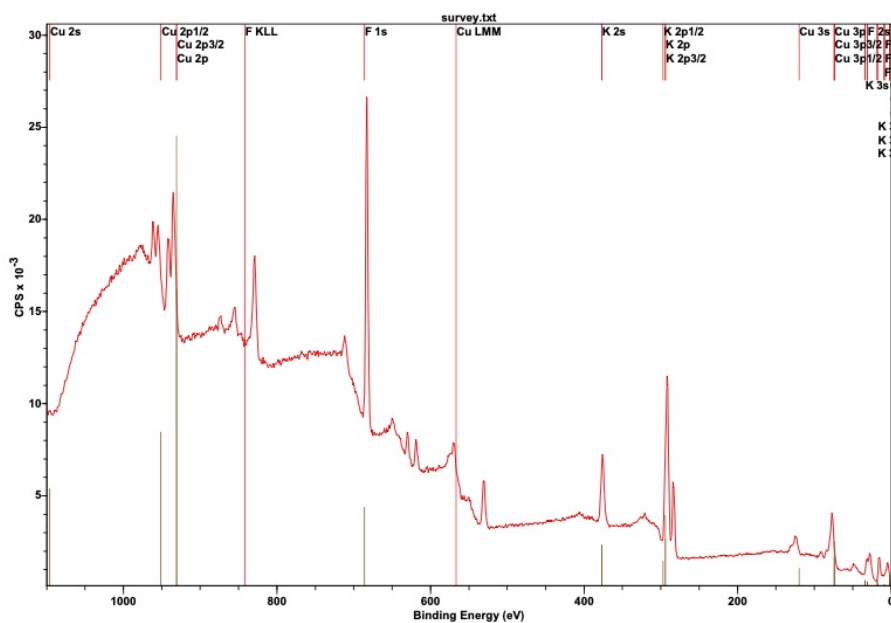

CasaXPS (This string can be edited in CasaXPS.DEF/PrintFootNote.txt)

**Figure 9.** XPS survey KCuF<sub>3</sub> 6h of milling.

12h:

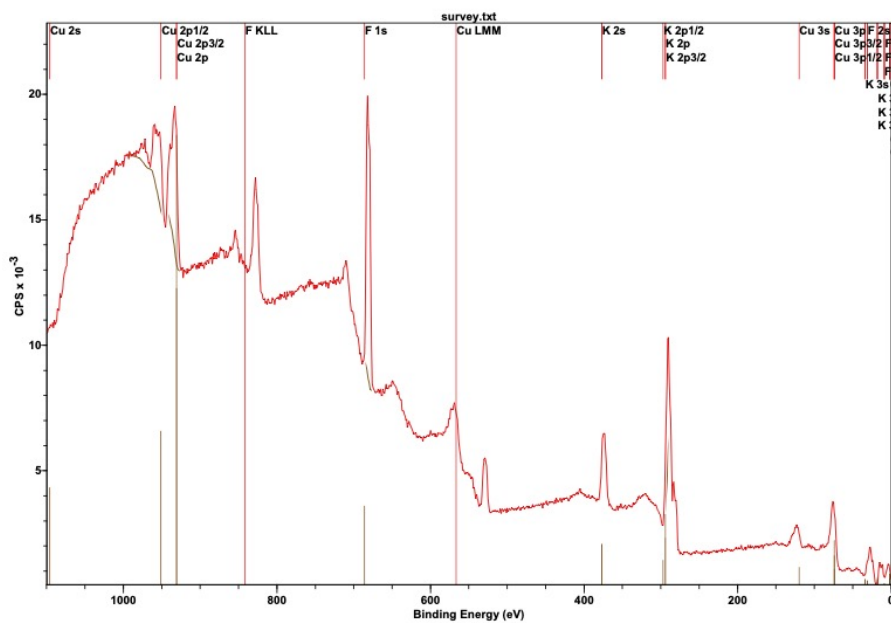

CasaXPS (This string can be edited in CasaXPS.DEF/PrintFootNote.txt)

**Figure 10.** XPS survey KCuF<sub>3</sub> 6h of milling.

Solvothermal:

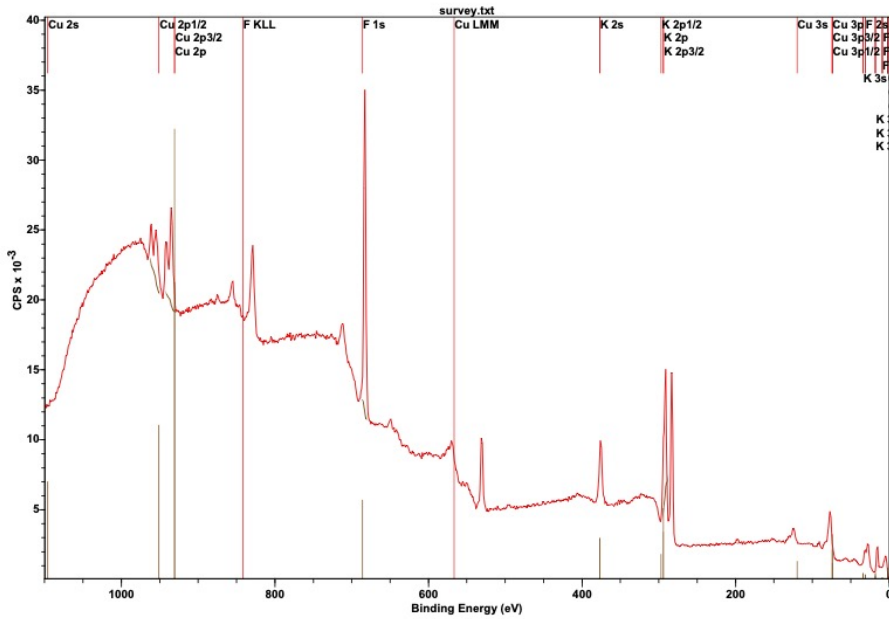

CasaXPS (This string can be edited in CasaXPS.DEF/PrintFootNote.txt)

Figure 11. XPS survey  $\text{KCuF}_3$  solvothermal.

$\text{KNiF}_3$

6h:

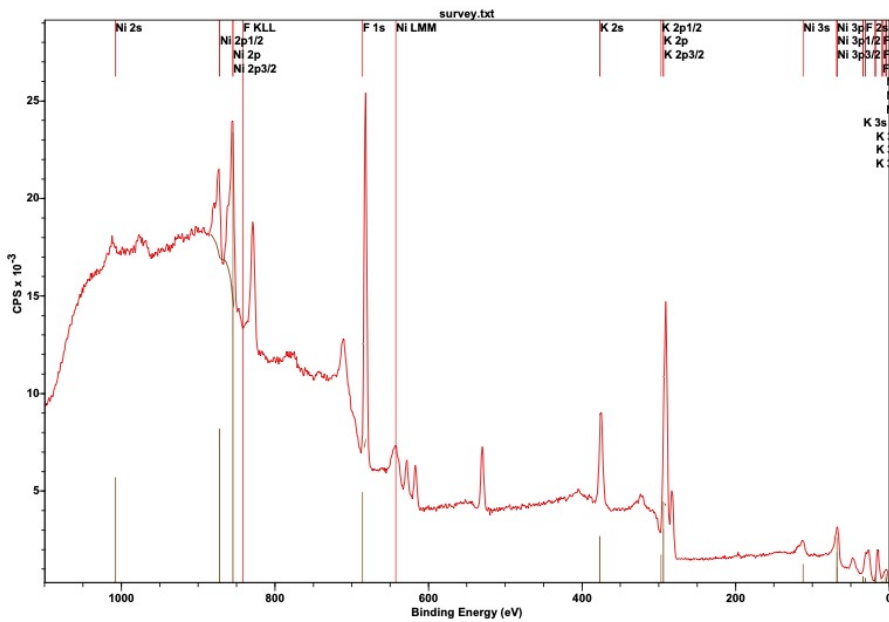

CasaXPS (This string can be edited in CasaXPS.DEF/PrintFootNote.txt)

Figure 12. XPS survey  $\text{KNiF}_3$  6h of milling.



12h:

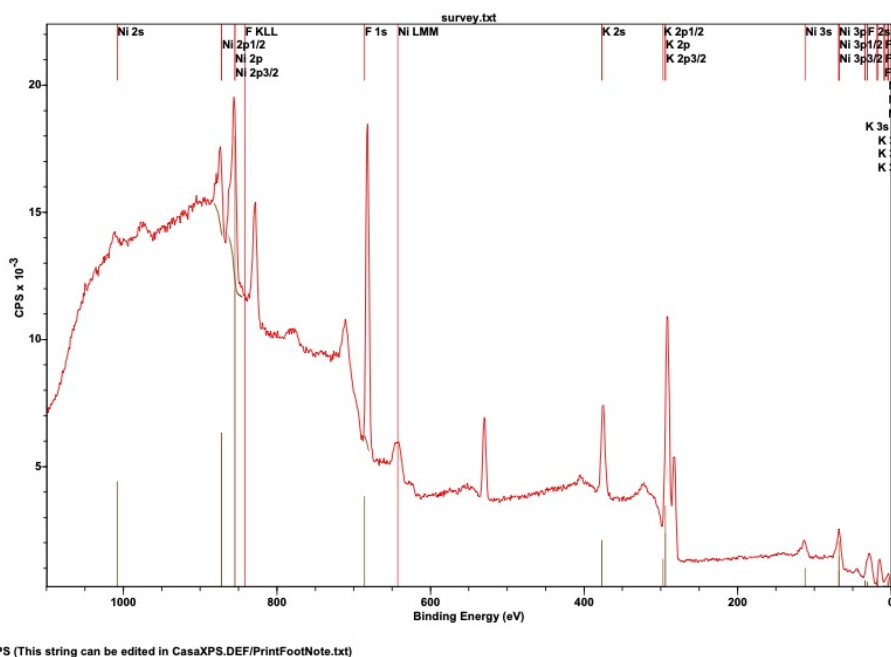

Figure 13. XPS survey KNiF<sub>3</sub> 12h of milling.

Solvothermal:

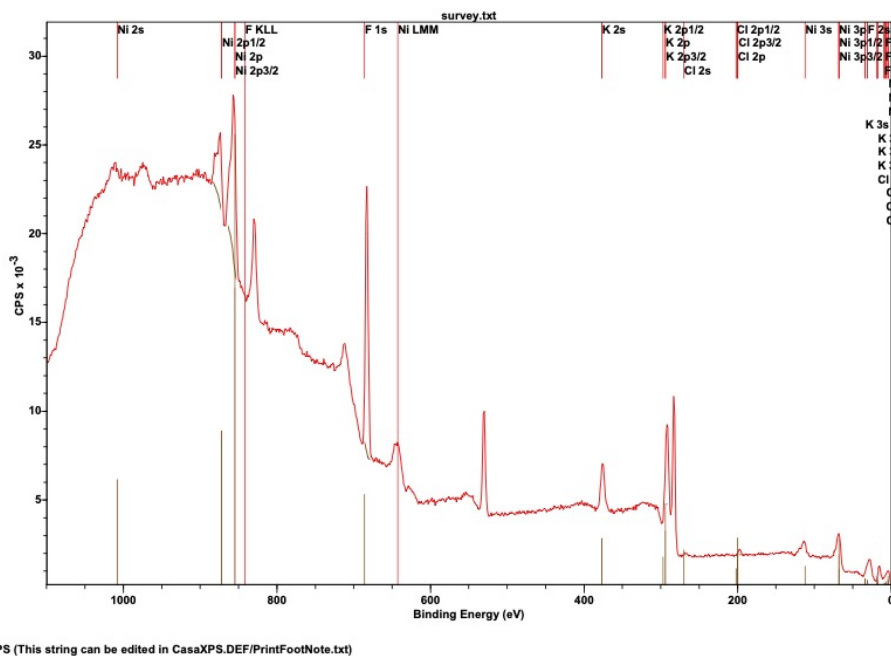

Figure 14. XPS survey KNiF<sub>3</sub> solvothermal.

**Green metrics**  
**Solvothermal process**

Atom Economy evaluation:

Considering the molecular weight of the reagents of the two solvothermal reaction and the two desired products it's possible to estimate the theoretical atom economy.

$$\text{Reagents MW} = \text{CuCl}_2 + 3\text{KF} = 134.45 \frac{\text{g}}{\text{mol}} + 3 \times 58.09 \frac{\text{g}}{\text{mol}} = 308.72 \frac{\text{g}}{\text{mol}}$$

$$\text{KCuF}_3 \text{ molecular weight} = 159.63 \frac{\text{g}}{\text{mol}}$$

$$\text{AE KCuF}_3 = \frac{159.63 \frac{\text{g}}{\text{mol}}}{308.72 \frac{\text{g}}{\text{mol}}} \times 100 = 51.7\%$$

$$\text{Reagents MW} = \text{NiCl}_2 * 6\text{H}_2\text{O} + 3\text{KF} = 237.69 \frac{\text{g}}{\text{mol}} + 3 \times 58.09 \frac{\text{g}}{\text{mol}} = 411.96 \frac{\text{g}}{\text{mol}}$$

$$\text{KNiF}_3 \text{ molecular weight} = 154.78 \frac{\text{g}}{\text{mol}}$$

$$\text{AE KNiF}_3 = \frac{154.78 \frac{\text{g}}{\text{mol}}}{411.96 \frac{\text{g}}{\text{mol}}} \times 100 = 37.6\%$$

Process mass intensity (PMI) evaluation:

The total mass used in the process is the sum of the reagents and the solvent employed in the solvothermal synthesis.

$$\text{PMI KCuF}_3 = \frac{0.261\text{g (KF)} + 0.201\text{g (CuCl}_2) + 40\text{g (EtOH)} + 5\text{g (H}_2\text{O)}}{0.238\text{g (KCuF}_3)} = 191.0$$

$$\text{PMI KNiF}_3 = \frac{0.174\text{g (KF)} + 0.236\text{g (NiCl}_2 * 6\text{H}_2\text{O)} + 40\text{g (EtOH)} + 5\text{g (H}_2\text{O)}}{0.154\text{g (KNiF}_3)} = 294.9$$

Energy consumption evaluation:

The oven used in the solvothermal synthesis and for the drying process is a Vacuum drying oven VC-20 Renggli AG/ SalvisLab with the following specifications:

**Tab 9.** Oven parameters.

|                                        |          |       |
|----------------------------------------|----------|-------|
| Volume                                 | liters   | 20    |
| Max load capacity                      | Kg       | 37    |
| Heating up velocity to 150°C from 20°C | min      | 58    |
| Nominal wattage while heating          | W        | 900   |
| Energy consumption                     |          |       |
|                                        | At 100°C | W     |
|                                        | At 150°C | W     |
| Maximum temperature                    | °C       | 200   |
| Working temperature range              | °C       | 15-25 |

To evaluate how much perovskites could be produced with this equipment it was evaluated how many autoclaves could be heated in this model VC-20.

Knowing the weight of the autoclave implemented, 2.15Kg, and the maximum load of the oven, 37 Kg, it was determined that a maximum of 17 autoclaves can be heated at the same time. A total of 2.61g of KNiF<sub>3</sub> and 4.05g of KCuF<sub>3</sub> are then produced considering a complete yield of reaction.

To evaluate the energy consumption of the oven it was considered a value of 900W for 60 minutes of heating from 25 to 185°C and an average consumption of 250 W for maintaining the temperature reached for the 15 hours left.

For the drying process an average consumption of 185W for 12 hours was considered.

Energy usage:

$$\text{Synthesis: } (1h \times 900W) + (15h \times 250W) = 4650 Wh \text{ or } 16.7 \text{ MJ}$$

$$\text{Drying process: } 12h \times 185W = 2220 Wh \text{ or } 8.0 \text{ MJ}$$

$$\text{Total energy consumption: } 16.7 \text{ MJ} + 8.0 \text{ MJ} = 24.7 \text{ MJ}$$

Considering the amount of final product obtainable for the two perovskites:

$$\text{KCuF}_3: \frac{24.7 \text{ MJ}}{4.05g} = 6.1 \frac{\text{MJ}}{g}$$

$$\text{KNiF}_3: \frac{24.7 \text{ MJ}}{2.61g} = 9.5 \frac{\text{MJ}}{g}$$

## Mechanochemical process

Atom Economy evaluation:

Considering the molecular weight of the reagents of the two solvothermal reaction and the two desired products it's possible to estimate the theoretical atom economy.

$$\text{Reagents MW} = \text{CuF}_2 + \text{KF} = 101.54 \frac{g}{mol} + 58.09 \frac{g}{mol} = 159.63 \frac{g}{mol}$$

$$\text{KCuF}_3 \text{ molecular weight} = 159.63 \frac{g}{mol}$$

$$\text{AE KCuF}_3 = \frac{159.63 \frac{g}{mol}}{159.63 \frac{g}{mol}} \times 100 = 100\%$$

$$\text{Reagents MW} = \text{NiF}_2 + \text{KF} = 96.69 \frac{g}{mol} + 58.09 \frac{g}{mol} = 154.78 \frac{g}{mol}$$

$$\text{KNiF}_3 \text{ molecular weight} = 154.78 \frac{g}{mol}$$

$$\text{AE KNiF}_3 = \frac{154.78 \frac{g}{mol}}{154.78 \frac{g}{mol}} \times 100 = 100\%$$

Process mass intensity (PMI) evaluation:

The total mass used in the process is the sum of the reagents and the solvent employed in the solvothermal synthesis.

$$PMI\ KCuF_3 = \frac{0.730g\ (KF) + 1.27g\ (CuF_2)}{2.0g\ (KCuF_3)} = 1.0$$

$$PMI\ KNiF_3 = \frac{0.750g\ (KF) + 1.25g\ (NiF_2)}{2.0g\ (KNiF_3)} = 1.0$$

Energy consumption evaluation:

For the mechanochemical process a TOB-ZQM Series from TOB NEW ENERGY has been employed. The specifications of the instrument are listed in the table below.

**Tab 10.** *Ball-miller parameters.*

|                          |     |             |
|--------------------------|-----|-------------|
| Dimension                | mm  | 600*400*500 |
| weight                   | Kg  | 60          |
| Ball milling tank volume | mL  | 50          |
| Medium diameters         | mm  | 5           |
| Maximum revolution speed | rpm | 450         |
| Total power              | W   | 550         |
| Number of rotating jars  |     | 4           |

To evaluate the energy consumption of the ball miller it was considered a value of 420 W comparing the consumption of the ball miller at 350rpm knowing the consumption of 550 W at 450 rpm.

Energy usage:

$$\text{Synthesis 3h: } 3h \times 420W = 1280\ Wh \text{ or } 4.6\ MJ$$

$$\text{Synthesis 6h: } 6h \times 420W = 2560\ Wh \text{ or } 9.2\ MJ$$

$$\text{Synthesis 12h: } 12h \times 420W = 5130\ Wh \text{ or } 18.5\ MJ$$

Considering the implementation of 4 jars inside the ball miller it is possible to produce 7.96g of  $KCuF_3$  and 7.96g of  $KNiF_3$ .

$$KCuF_3 \text{ and } KNiF_3 \text{ 3h: } \frac{4.6\ MJ}{7.96g} = 0.58 \frac{MJ}{g}$$

$$KCuF_3 \text{ and } KNiF_3 \text{ 6h: } \frac{9.2\ MJ}{7.96g} = 1.16 \frac{MJ}{g}$$

$$KCuF_3 \text{ and } KNiF_3 \text{ 12h: } \frac{18.5\ MJ}{7.96g} = 2.32 \frac{MJ}{g}$$
